# Supplementary material
Source: PubMed Central journal article supplement (PMC3960540)

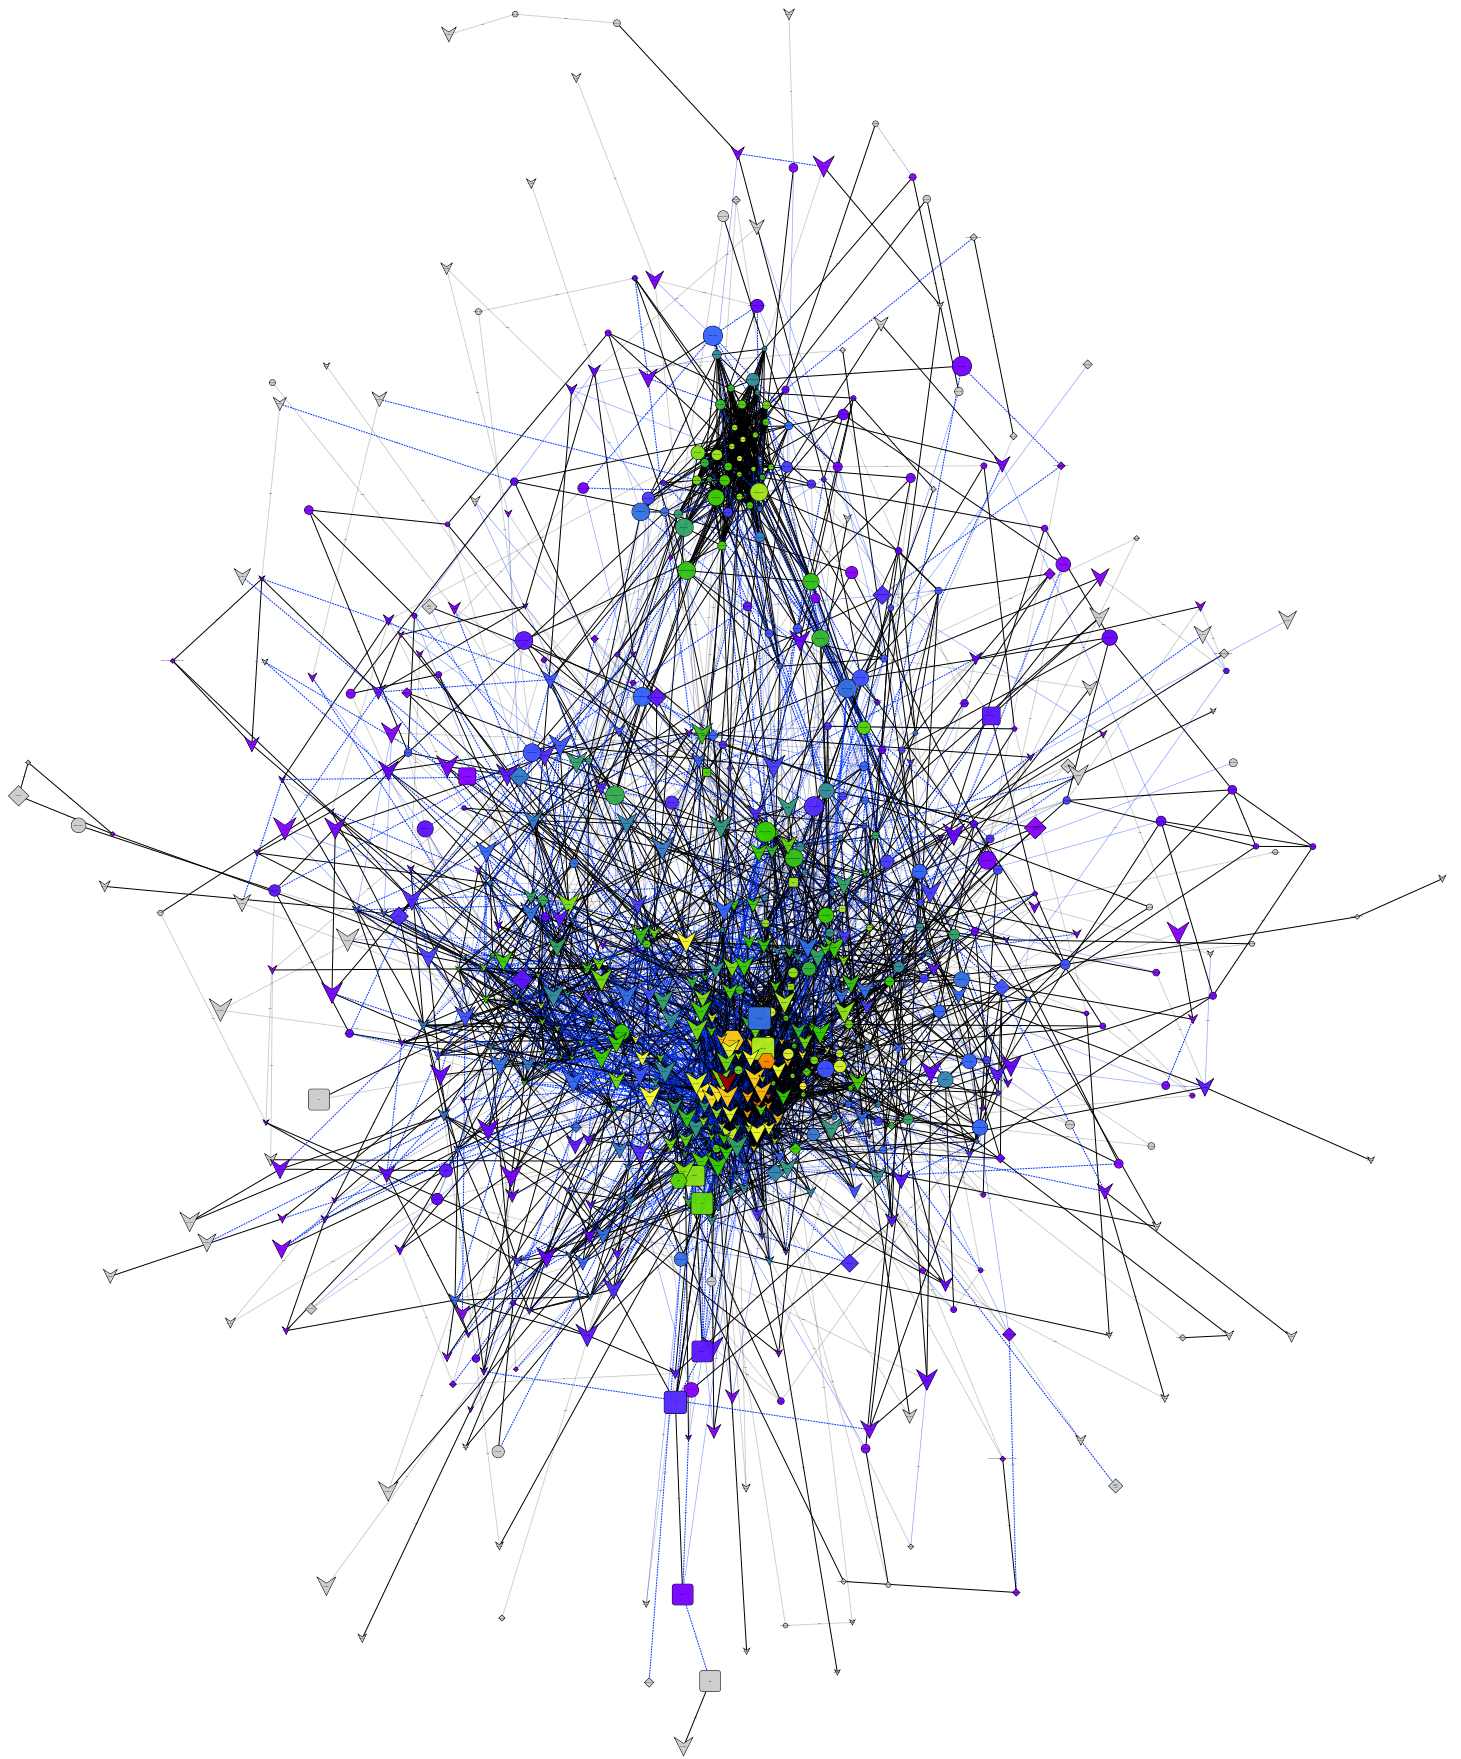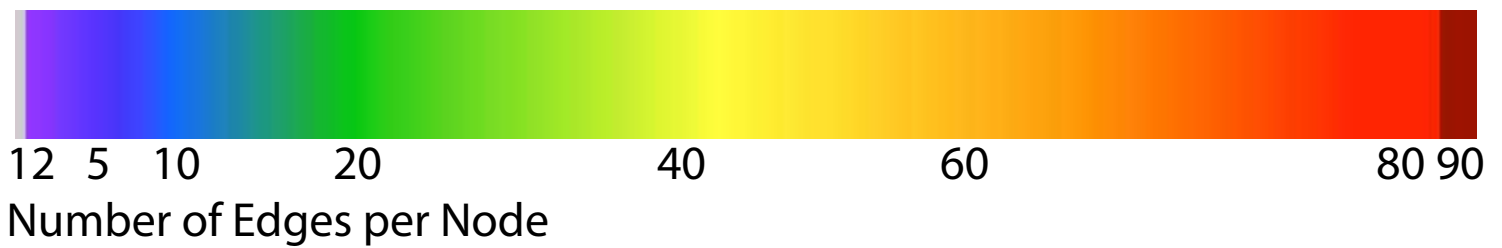

Supplement: ismej2013199x4.pdf [file ismej2013199x4.pdf]
